# Supplementary material
Source: PubMed Central journal article supplement (PMC5119484)
Supplement: NIHMS828818-supplement-supplement_1.pdf [file NIHMS828818-supplement-supplement_1.pdf]

## Supplementary Online Content

Wu J, Cho E, Willett WC, Sastry SM, Schaumberg DA. Intakes of lutein, zeaxanthin, and other carotenoids and age-related macular degeneration during 2 decades of prospective follow-up. *JAMA Ophthalmol*. Published online October 8, 2015. doi:10.1001/jamaophthalmol.2015.3590.

**eTable 1.** RRs of AMD according to quintiles of predicted plasma carotenoid scores and calculated intakes in NHS

**eTable 2.** RRs of AMD according to quintiles of predicted plasma carotenoid scores and calculated intakes in HPFS

**eFigure 1.** Predicted plasma carotenoid scores and RRs of total AMD according to current menopausal hormone use status among postmenopausal women

**eFigure 2.** Predicted plasma carotenoid scores and pooled RRs of advanced AMD according to A) age and B) smoking status

This supplementary material has been provided by the authors to give readers additional information about their work.

**eTable 1. RRs of AMD according to quintiles of predicted plasma carotenoid scores and calculated intakes in NHS**

| Advanced AMD             |              |       |                 |                          | Intermediate AMD       |                          |                        |                 |                          |                          |
|--------------------------|--------------|-------|-----------------|--------------------------|------------------------|--------------------------|------------------------|-----------------|--------------------------|--------------------------|
| Predicted plasma level   |              |       |                 |                          | †Calculated intake     |                          | Predicted plasma level |                 |                          | †Calculated intake       |
| Quintiles (median, µg/L) | Person-years | Cases | Age-adjusted RR | Multivariate RR (95% CI) | Quintiles (median, µg) | Multivariate RR (95% CI) | Cases                  | Age-adjusted RR | Multivariate RR (95% CI) | Multivariate RR (95% CI) |
| <b>Lutein/Zeaxanthin</b> |              |       |                 |                          |                        |                          |                        |                 |                          |                          |
| Q1 (152)                 | 221,930      | 175   | 1 (Ref.)        | 1 (Ref.)                 | 1,408                  | 1 (Ref.)                 | 206                    | 1 (Ref.)        | 1 (Ref.)                 | 1 (Ref.)                 |
| Q2 (161)                 | 222,331      | 151   | 0.83            | 0.83 (0.66,1.03)         | 2,098                  | 0.84 (0.67,1.04)         | 198                    | 0.93            | 0.96 (0.78,1.16)         | 0.82 (0.67,1.00)         |
| Q3 (169)                 | 222,557      | 175   | 0.93            | 0.92 (0.74,1.14)         | 2,680                  | 0.78 (0.63,0.98)         | 192                    | 0.87            | 0.91 (0.74,1.11)         | 0.91 (0.74,1.11)         |
| Q4 (179)                 | 222,865      | 157   | 0.83            | 0.81 (0.64,1.01)         | 3,389                  | 0.72 (0.57,0.91)         | 188                    | 0.84            | 0.89 (0.72,1.09)         | 0.93 (0.76,1.14)         |
| Q5 (198)                 | 222,585      | 115   | 0.60            | 0.59 (0.46,0.76)         | 4,834                  | 0.68 (0.54,0.87)         | 199                    | 0.88            | 0.94 (0.76,1.16)         | 0.90 (0.72,1.11)         |
| p for trend              |              |       | <.0001          | <.0001                   |                        | 0.003                    |                        | 0.16            | 0.53                     | 0.73                     |
| <b>β-cryptoxanthin</b>   |              |       |                 |                          |                        |                          |                        |                 |                          |                          |
| Q1 (59)                  | 221,975      | 150   | 1 (Ref.)        | 1 (Ref.)                 | 80                     | 1 (Ref.)                 | 187                    | 1 (Ref.)        | 1 (Ref.)                 | 1 (Ref.)                 |
| Q2 (65)                  | 222,325      | 158   | 0.92            | 0.98 (0.78,1.23)         | 128                    | 0.79 (0.62,0.99)         | 170                    | 0.81            | 0.86 (0.70,1.06)         | 0.96 (0.78,1.18)         |
| Q3 (72)                  | 222,623      | 151   | 0.80            | 0.87 (0.69,1.10)         | 171                    | 0.85 (0.68,1.07)         | 214                    | 0.94            | 1.02 (0.84,1.25)         | 1.01 (0.82,1.24)         |
| Q4 (89)                  | 222,625      | 172   | 0.84            | 0.94 (0.75,1.17)         | 218                    | 0.82 (0.66,1.03)         | 204                    | 0.83            | 0.93 (0.76,1.14)         | 0.93 (0.76,1.15)         |
| Q5 (93)                  | 222,720      | 142   | 0.64            | 0.74 (0.58,0.93)         | 297                    | 0.70 (0.55,0.88)         | 208                    | 0.79            | 0.92 (0.75,1.13)         | 0.98 (0.79,1.20)         |
| p for trend              |              |       | 0.0001          | 0.01                     |                        | 0.009                    |                        | 0.04            | 0.66                     | 0.79                     |
| <b>Lycopene</b>          |              |       |                 |                          |                        |                          |                        |                 |                          |                          |
| Q1 (354)                 | 222,439      | 203   | 1 (Ref.)        | 1 (Ref.)                 | 3,322                  | 1 (Ref.)                 | 264                    | 1 (Ref.)        | 1 (Ref.)                 | 1 (Ref.)                 |
| Q2 (370)                 | 222,454      | 173   | 1.03            | 1.01 (0.82,1.24)         | 4,693                  | 1.05 (0.85,1.29)         | 205                    | 0.92            | 0.92 (0.77,1.11)         | 1.01 (0.84,1.21)         |
| Q3 (383)                 | 222,524      | 147   | 1.01            | 0.98 (0.79,1.21)         | 5,814                  | 1.03 (0.84,1.28)         | 190                    | 0.97            | 0.97 (0.80,1.17)         | 0.93 (0.76,1.13)         |
| Q4 (400)                 | 222,622      | 124   | 0.95            | 0.91 (0.72,1.14)         | 7,205                  | 0.76 (0.60,0.97)         | 158                    | 0.88            | 0.88 (0.72,1.08)         | 1.01 (0.83,1.23)         |
| Q5 (438)                 | 222,229      | 126   | 1.10            | 1.04 (0.82,1.30)         | 9,909                  | 1.04 (0.83,1.29)         | 166                    | 1.04            | 1.03 (0.84,1.25)         | 1.05 (0.86,1.28)         |
| p for trend              |              |       | 0.57            | 0.99                     |                        | 0.60                     |                        | 0.80            | 0.88                     | 0.61                     |
| <b>α-carotene</b>        |              |       |                 |                          |                        |                          |                        |                 |                          |                          |
| Q1 (51)                  | 221,588      | 163   | 1 (Ref.)        | 1 (Ref.)                 | 323                    | 1 (Ref.)                 | 191                    | 1 (Ref.)        | 1 (Ref.)                 | 1 (Ref.)                 |
| Q2 (55)                  | 222,435      | 174   | 0.93            | 0.99 (0.79,1.22)         | 507                    | 0.72 (0.58,0.91)         | 190                    | 0.88            | 0.92 (0.75,1.13)         | 1.00 (0.81,1.23)         |
| Q3 (58)                  | 222,649      | 156   | 0.76            | 0.83 (0.66,1.04)         | 681                    | 0.81 (0.65,1.01)         | 204                    | 0.87            | 0.94 (0.77,1.16)         | 1.07 (0.87,1.33)         |
| Q4 (65)                  | 222,787      | 154   | 0.74            | 0.82 (0.65,1.03)         | 932                    | 0.81 (0.65,1.01)         | 184                    | 0.77            | 0.85 (0.69,1.05)         | 1.18 (0.96,1.45)         |
| Q5 (79)                  | 222,810      | 126   | 0.57            | 0.64 (0.50,0.82)         | 1,429                  | 0.61 (0.48,0.77)         | 214                    | 0.84            | 0.96 (0.78,1.18)         | 1.05 (0.85,1.30)         |
| p for trend              |              |       | <.0001          | 0.0001                   |                        | 0.0007                   |                        | 0.12            | 0.80                     | 0.51                     |

**β-carotene**

|             |         |     |          |                  |       |                  |     |          |                  |                  |
|-------------|---------|-----|----------|------------------|-------|------------------|-----|----------|------------------|------------------|
| Q1 (198)    | 221,515 | 145 | 1 (Ref.) | 1 (Ref.)         | 2,278 | 1 (Ref.)         | 175 | 1 (Ref.) | 1 (Ref.)         | 1 (Ref.)         |
| Q2 (215)    | 222,388 | 167 | 1.00     | 1.01 (0.81,1.27) | 3,312 | 1.07 (0.85,1.34) | 192 | 0.95     | 0.97 (0.79,1.20) | 1.05 (0.85,1.29) |
| Q3 (231)    | 222,589 | 164 | 0.92     | 0.96 (0.76,1.21) | 4,220 | 1.07 (0.84,1.34) | 210 | 0.98     | 1.03 (0.84,1.27) | 1.12 (0.90,1.38) |
| Q4 (254)    | 222,858 | 139 | 0.74     | 0.78 (0.61,1.00) | 5,353 | 0.84 (0.65,1.08) | 190 | 0.85     | 0.92 (0.74,1.15) | 1.10 (0.89,1.36) |
| Q5 (315)    | 222,917 | 158 | 0.83     | 0.88 (0.69,1.13) | 7,584 | 0.86 (0.66,1.11) | 216 | 0.94     | 1.04 (0.83,1.29) | 1.02 (0.81,1.28) |
| p for trend |         |     | 0.02     | 0.15             |       | 0.05             |     | 0.49     | 0.74             | 0.97             |

**β-carotene from food**

|             |         |     |          |                  |       |                  |     |          |                  |                  |
|-------------|---------|-----|----------|------------------|-------|------------------|-----|----------|------------------|------------------|
| Q1 (200)    | 214,856 | 151 | 1 (Ref.) | 1 (Ref.)         | 2,151 | 1 (Ref.)         | 170 | 1 (Ref.) | 1 (Ref.)         | 1 (Ref.)         |
| Q2 (215)    | 214,310 | 160 | 0.91     | 0.90 (0.72,1.13) | 3,092 | 0.98 (0.78,1.24) | 179 | 0.91     | 0.93 (0.75,1.16) | 0.84 (0.68,1.04) |
| Q3 (229)    | 212,920 | 147 | 0.78     | 0.78 (0.61,0.99) | 3,913 | 0.91 (0.72,1.15) | 191 | 0.91     | 0.96 (0.77,1.19) | 0.98 (0.80,1.21) |
| Q4 (248)    | 211,231 | 151 | 0.78     | 0.78 (0.61,0.99) | 4,907 | 0.78 (0.61,0.99) | 185 | 0.86     | 0.94 (0.75,1.17) | 0.97 (0.78,1.20) |
| Q5 (289)    | 208,284 | 135 | 0.66     | 0.66 (0.51,0.85) | 6,759 | 0.66 (0.51,0.85) | 205 | 0.91     | 1.02 (0.81,1.28) | 0.91 (0.73,1.14) |
| p for trend |         |     | 0.0003   | 0.001            |       | 0.0002           |     | 0.44     | 0.69             | 0.80             |

**Total carotene from food**

|             |         |     |          |                  |       |                  |     |          |                  |                  |
|-------------|---------|-----|----------|------------------|-------|------------------|-----|----------|------------------|------------------|
| Q1 (253)    | 214,758 | 152 | 1 (Ref.) | 1 (Ref.)         | 2,668 | 1 (Ref.)         | 175 | 1 (Ref.) | 1 (Ref.)         | 1 (Ref.)         |
| Q2 (271)    | 214,258 | 170 | 0.94     | 0.94 (0.75,1.18) | 3,865 | 1.05 (0.83,1.31) | 174 | 0.84     | 0.87 (0.70,1.08) | 0.90 (0.73,1.12) |
| Q3 (289)    | 213,028 | 140 | 0.73     | 0.73 (0.58,0.93) | 4,927 | 0.91 (0.72,1.15) | 201 | 0.92     | 0.98 (0.79,1.21) | 1.08 (0.87,1.32) |
| Q4 (313)    | 210,987 | 146 | 0.73     | 0.74 (0.58,0.95) | 6,274 | 0.75 (0.59,0.96) | 175 | 0.78     | 0.85 (0.68,1.06) | 0.95 (0.77,1.18) |
| Q5 (366)    | 208,570 | 136 | 0.65     | 0.66 (0.51,0.86) | 8,855 | 0.70 (0.54,0.90) | 205 | 0.87     | 0.98 (0.79,1.23) | 0.99 (0.79,1.23) |
| p for trend |         |     | <.0001   | 0.001            |       | 0.0003           |     | 0.29     | 0.83             | 0.95             |

**<sup>§</sup>Total carotenoid index**

|             |         |     |          |                  |    |                  |     |          |                  |                  |
|-------------|---------|-----|----------|------------------|----|------------------|-----|----------|------------------|------------------|
| Q1 (9)      | 222,083 | 174 | 1 (Ref.) | 1 (Ref.)         | 8  | 1 (Ref.)         | 218 | 1 (Ref.) | 1 (Ref.)         | 1 (Ref.)         |
| Q2 (12)     | 221,393 | 172 | 0.95     | 0.97 (0.78,1.20) | 12 | 0.89 (0.71,1.11) | 166 | 0.73     | 0.76 (0.62,0.93) | 0.98 (0.80,1.21) |
| Q3 (15)     | 234,719 | 160 | 0.79     | 0.81 (0.65,1.01) | 15 | 0.75 (0.60,0.94) | 214 | 0.84     | 0.90 (0.74,1.09) | 1.00 (0.81,1.22) |
| Q4 (18)     | 208,544 | 137 | 0.74     | 0.77 (0.61,0.97) | 18 | 0.77 (0.61,0.96) | 177 | 0.77     | 0.84 (0.68,1.03) | 1.08 (0.88,1.33) |
| Q5 (21)     | 225,528 | 130 | 0.64     | 0.67 (0.53,0.86) | 22 | 0.69 (0.55,0.87) | 208 | 0.81     | 0.92 (0.75,1.13) | 1.03 (0.83,1.26) |
| p for trend |         |     | <.0001   | 0.0003           |    | 0.001            |     | 0.09     | 0.76             | 0.60             |

Multivariate models were adjusted for: age (continuous), BMI (<18.5, 18.5-23, 23-25, 25-30, 30-35, ≥ 35 kg/m<sup>2</sup>), pack-years of smoking (never, 1-9, 10-24, 25-44, 45-64, ≥65y), physical activity (<3, 3-8.9, 9-17.9, 18-26.9, ≥27 MET-h/wk), current aspirin use (≥1 tablets/wk or none), history of hypertension, diabetes and cardiovascular diseases, postmenopausal status and menopausal hormone use (never, current and past), dietary variables including aHEI (excluding fruits and vegetables), alcohol intake, DHA and ALA (all in quintiles).

<sup>§</sup> Total carotenoid index was created by summing the quintile score of each carotenoid.

<sup>¶</sup> Models were additionally adjusted for total calorie intake (in quintiles).

**eTable 2. RRs of AMD according to quintiles of predicted plasma carotenoid scores and calculated intakes in HPFS**

| Advanced AMD             |              |       |                 |                          | Intermediate AMD       |                          |                        |                 |                          |                          |
|--------------------------|--------------|-------|-----------------|--------------------------|------------------------|--------------------------|------------------------|-----------------|--------------------------|--------------------------|
| Predicted plasma level   |              |       |                 |                          | Calculated intake      |                          | Predicted plasma level |                 |                          | Calculated intake        |
| Quintiles (median, µg/L) | Person-years | Cases | Age-adjusted RR | Multivariate RR (95% CI) | Quintiles (median, µg) | Multivariate RR (95% CI) | Cases                  | Age-adjusted RR | Multivariate RR (95% CI) | Multivariate RR (95% CI) |
| <b>Lutein/Zeaxanthin</b> |              |       |                 |                          |                        |                          |                        |                 |                          |                          |
| Q1 (151)                 | 98,632       | 78    | 1(Ref.)         | 1(Ref.)                  | 1,511                  | 1(Ref.)                  | 72                     | 1(Ref.)         | 1(Ref.)                  | 1(Ref.)                  |
| Q2 (161)                 | 99,238       | 65    | 0.76            | 0.81 (0.58,1.13)         | 2,313                  | 1.05 (0.75,1.47)         | 72                     | 0.94            | 1.01 (0.72,1.40)         | 1.27 (0.92,1.76)         |
| Q3 (169)                 | 99,631       | 79    | 0.92            | 0.98 (0.71,1.35)         | 3,012                  | 1.06 (0.75,1.49)         | 79                     | 1.00            | 1.07 (0.77,1.48)         | 1.13 (0.81,1.58)         |
| Q4 (180)                 | 99,764       | 73    | 0.82            | 0.88 (0.63,1.23)         | 3,864                  | 1.06 (0.75,1.50)         | 81                     | 0.98            | 1.04 (0.75,1.44)         | 1.06 (0.75,1.50)         |
| Q5 (203)                 | 99,651       | 50    | 0.53            | 0.59 (0.41,0.86)         | 5,629                  | 1.08 (0.75,1.55)         | 74                     | 0.86            | 0.92 (0.66,1.30)         | 1.20 (0.84,1.70)         |
| p for trend              |              |       | 0.001           | 0.01                     |                        | 0.71                     |                        | 0.41            | 0.62                     | 0.65                     |
| <b>β-cryptoxanthin</b>   |              |       |                 |                          |                        |                          |                        |                 |                          |                          |
| Q1 (58)                  | 98,452       | 67    | 1(Ref.)         | 1(Ref.)                  | 82                     | 1(Ref.)                  | 71                     | 1(Ref.)         | 1(Ref.)                  | 1(Ref.)                  |
| Q2 (65)                  | 99,347       | 63    | 0.80            | 0.87 (0.61,1.23)         | 141                    | 0.94 (0.67,1.34)         | 69                     | 0.84            | 0.90 (0.64,1.26)         | 0.98 (0.71,1.36)         |
| Q3 (72)                  | 99,481       | 72    | 0.78            | 0.86 (0.61,1.21)         | 194                    | 0.90 (0.63,1.26)         | 82                     | 0.86            | 0.93 (0.67,1.29)         | 0.90 (0.65,1.25)         |
| Q4 (80)                  | 99,868       | 74    | 0.72            | 0.82 (0.58,1.15)         | 253                    | 0.88 (0.62,1.25)         | 83                     | 0.77            | 0.87 (0.62,1.20)         | 0.83 (0.59,1.16)         |
| Q5 (99)                  | 99,767       | 69    | 0.62            | 0.73 (0.51,1.04)         | 358                    | 0.75 (0.52,1.07)         | 73                     | 0.62            | 0.70 (0.50,0.99)         | 0.72 (0.51,1.01)         |
| p for trend              |              |       | 0.006           | 0.09                     |                        | 0.10                     |                        | 0.004           | 0.04                     | 0.03                     |
| <b>Lycopene</b>          |              |       |                 |                          |                        |                          |                        |                 |                          |                          |
| Q1 (346)                 | 99,214       | 115   | 1(Ref.)         | 1(Ref.)                  | 3,259                  | 1(Ref.)                  | 105                    | 1(Ref.)         | 1(Ref.)                  | 1(Ref.)                  |
| Q2 (364)                 | 99,328       | 82    | 0.91            | 0.94 (0.70,1.25)         | 5,079                  | 0.96 (0.71,1.29)         | 79                     | 0.96            | 1.01 (0.75,1.36)         | 0.92 (0.68,1.24)         |
| Q3 (379)                 | 99,617       | 61    | 0.81            | 0.84 (0.61,1.15)         | 6,609                  | 0.84 (0.60,1.16)         | 74                     | 1.07            | 1.13 (0.83,1.53)         | 1.11 (0.82,1.50)         |
| Q4 (400)                 | 99,563       | 47    | 0.71            | 0.74 (0.52,1.04)         | 8,599                  | 0.79 (0.56,1.12)         | 65                     | 1.08            | 1.13 (0.83,1.55)         | 1.13 (0.82,1.55)         |
| Q5 (450)                 | 99,195       | 40    | 0.69            | 0.70 (0.49,1.02)         | 12,589                 | 0.93 (0.66,1.30)         | 55                     | 1.04            | 1.07 (0.76,1.49)         | 1.04 (0.75,1.45)         |
| p for trend              |              |       | 0.02            | 0.03                     |                        | 0.46                     |                        | 0.65            | 0.58                     | 0.56                     |
| <b>α-carotene</b>        |              |       |                 |                          |                        |                          |                        |                 |                          |                          |
| Q1 (50)                  | 98,248       | 60    | 1(Ref.)         | 1(Ref.)                  | 345                    | 1(Ref.)                  | 77                     | 1(Ref.)         | 1(Ref.)                  | 1(Ref.)                  |
| Q2 (54)                  | 99,174       | 67    | 0.94            | 1.00 (0.70,1.43)         | 551                    | 1.02 (0.73,1.43)         | 59                     | 0.67            | 0.75 (0.53,1.06)         | 0.81 (0.58,1.13)         |
| Q3 (58)                  | 99,716       | 79    | 1.03            | 1.16 (0.82,1.64)         | 753                    | 0.84 (0.59,1.20)         | 70                     | 0.70            | 0.83 (0.59,1.15)         | 0.67 (0.47,0.95)         |
| Q4 (65)                  | 99,752       | 76    | 0.91            | 1.05 (0.74,1.49)         | 1,069                  | 0.85 (0.60,1.20)         | 82                     | 0.78            | 0.92 (0.66,1.27)         | 1.04 (0.76,1.42)         |
| Q5 (82)                  | 100,026      | 63    | 0.67            | 0.80 (0.55,1.15)         | 1,713                  | 0.88 (0.62,1.25)         | 90                     | 0.75            | 0.89 (0.64,1.23)         | 0.83 (0.60,1.15)         |
| p for trend              |              |       | 0.01            | 0.12                     |                        | 0.41                     |                        | 0.43            | 0.95                     | 0.85                     |

**β-carotene**

|             |         |    |         |                  |       |                  |    |         |                  |                  |
|-------------|---------|----|---------|------------------|-------|------------------|----|---------|------------------|------------------|
| Q1 (192)    | 98,210  | 69 | 1(Ref.) | 1(Ref.)          | 2,439 | 1(Ref.)          | 58 | 1(Ref.) | 1(Ref.)          | 1(Ref.)          |
| Q2 (210)    | 99,137  | 73 | 0.81    | 0.88 (0.63,1.22) | 3,666 | 1.00 (0.72,1.39) | 75 | 1.05    | 1.15 (0.81,1.63) | 0.85 (0.60,1.19) |
| Q3 (228)    | 99,549  | 66 | 0.69    | 0.77 (0.54,1.10) | 4,782 | 0.74 (0.52,1.06) | 83 | 1.06    | 1.23 (0.87,1.74) | 1.03 (0.75,1.43) |
| Q4 (256)    | 99,826  | 76 | 0.71    | 0.83 (0.59,1.18) | 6,257 | 0.89 (0.63,1.26) | 87 | 1.00    | 1.19 (0.84,1.69) | 0.84 (0.60,1.19) |
| Q5 (351)    | 100,195 | 61 | 0.58    | 0.69 (0.48,1.00) | 9,409 | 0.86 (0.59,1.24) | 75 | 0.85    | 1.00 (0.69,1.45) | 0.93 (0.65,1.31) |
| p for trend |         |    | 0.005   | 0.08             |       | 0.44             |    | 0.18    | 0.58             | 0.78             |

**β-carotene from food**

|             |        |    |         |                  |       |                  |    |         |                  |                  |
|-------------|--------|----|---------|------------------|-------|------------------|----|---------|------------------|------------------|
| Q1 (194)    | 90,917 | 66 | 1(Ref.) | 1(Ref.)          | 2,273 | 1(Ref.)          | 55 | 1(Ref.) | 1(Ref.)          | 1(Ref.)          |
| Q2 (209)    | 90,665 | 53 | 0.64    | 0.69 (0.47,0.99) | 3,362 | 0.95 (0.67,1.35) | 55 | 0.82    | 0.90 (0.62,1.31) | 0.92 (0.64,1.32) |
| Q3 (223)    | 90,047 | 71 | 0.76    | 0.85 (0.60,1.21) | 4,315 | 0.86 (0.60,1.24) | 65 | 0.86    | 0.99 (0.68,1.43) | 0.90 (0.62,1.30) |
| Q4 (242)    | 88,893 | 72 | 0.69    | 0.81 (0.57,1.16) | 5,502 | 1.06 (0.74,1.51) | 83 | 1.02    | 1.20 (0.83,1.72) | 1.13 (0.79,1.60) |
| Q5 (285)    | 86,289 | 55 | 0.49    | 0.60 (0.40,0.88) | 7,758 | 0.75 (0.50,1.11) | 82 | 0.89    | 1.04 (0.71,1.51) | 0.94 (0.65,1.36) |
| p for trend |        |    | 0.0008  | 0.04             |       | 0.24             |    | 0.93    | 0.51             | 0.93             |

**Total carotene from food**

|             |        |    |         |                  |        |                  |    |         |                  |                  |
|-------------|--------|----|---------|------------------|--------|------------------|----|---------|------------------|------------------|
| Q1 (246)    | 90,945 | 65 | 1(Ref.) | 1(Ref.)          | 2,728  | 1(Ref.)          | 57 | 1(Ref.) | 1(Ref.)          | 1(Ref.)          |
| Q2 (265)    | 90,639 | 59 | 0.71    | 0.78 (0.54,1.12) | 4,030  | 0.80 (0.56,1.15) | 57 | 0.81    | 0.91 (0.62,1.32) | 0.79 (0.55,1.13) |
| Q3 (282)    | 89,870 | 68 | 0.72    | 0.83 (0.58,1.18) | 5,241  | 0.86 (0.61,1.23) | 58 | 0.74    | 0.86 (0.59,1.25) | 0.74 (0.52,1.06) |
| Q4 (307)    | 88,928 | 72 | 0.70    | 0.83 (0.58,1.18) | 6,823  | 0.84 (0.59,1.20) | 87 | 1.03    | 1.22 (0.85,1.74) | 0.99 (0.71,1.40) |
| Q5 (364)    | 86,430 | 53 | 0.48    | 0.58 (0.39,0.87) | 10,034 | 0.78 (0.53,1.13) | 81 | 0.84    | 1.00 (0.68,1.44) | 0.82 (0.57,1.18) |
| p for trend |        |    | 0.0003  | 0.02             |        | 0.29             |    | 0.87    | 0.60             | 0.76             |

**Total carotenoid index**

|             |         |    |         |                  |    |                  |    |         |                  |                  |
|-------------|---------|----|---------|------------------|----|------------------|----|---------|------------------|------------------|
| Q1 (9)      | 96,159  | 72 | 1(Ref.) | 1(Ref.)          | 8  | 1(Ref.)          | 73 | 1(Ref.) | 1(Ref.)          | 1(Ref.)          |
| Q2 (12)     | 98,756  | 74 | 0.87    | 0.92 (0.66,1.28) | 18 | 0.70 (0.49,1.00) | 61 | 0.73    | 0.80 (0.57,1.12) | 0.87 (0.62,1.21) |
| Q3 (15)     | 108,051 | 84 | 0.84    | 0.93 (0.67,1.28) | 15 | 0.99 (0.72,1.36) | 90 | 0.91    | 1.03 (0.75,1.42) | 0.91 (0.66,1.26) |
| Q4 (18)     | 96,109  | 64 | 0.68    | 0.78 (0.55,1.11) | 18 | 0.84 (0.60,1.18) | 76 | 0.81    | 0.94 (0.67,1.32) | 1.02 (0.74,1.40) |
| Q5 (21)     | 97,841  | 51 | 0.52    | 0.61 (0.42,0.89) | 22 | 0.80 (0.56,1.12) | 78 | 0.78    | 0.93 (0.66,1.31) | 0.91 (0.66,1.27) |
| p for trend |         |    | 0.0001  | 0.009            |    | 0.36             |    | 0.29    | 0.99             | 0.85             |

Multivariate models were adjusted for the same variables as eTable 1 except postmenopausal status and hormone use and additionally adjusted for race (Caucasian v.s. non- Caucasian)

**eFigure 1. Predicted plasma carotenoid scores and RRs of total AMD according to current menopausal hormone use status among postmenopausal women**

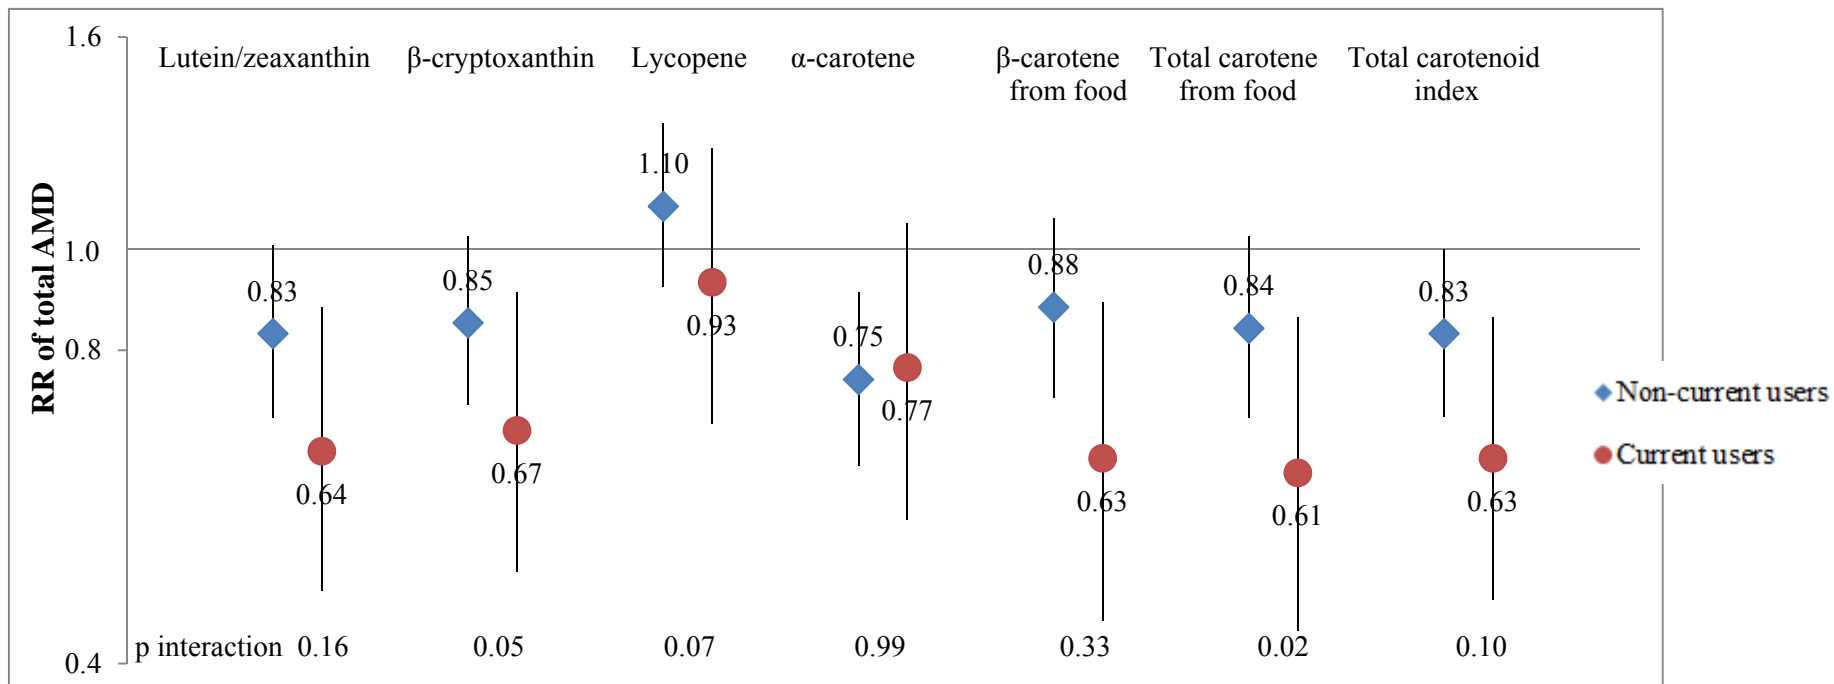

There were 1,221 cases in non-current users group and 413 cases in current users group

All the RRs were comparing the fifth to the bottom quintile

Multivariate models were adjusted for: age (continuous), BMI ( $\geq 30$  kg/m<sup>2</sup>), pack-years of smoking (never, 1-9, 10-24, 25-44, 45-64,  $\geq 65$ y), physical activity (<3, 3-8.9, 9-17.9, 18-26.9,  $\geq 27$  MET-h/wk), current aspirin use ( $\geq 1$  tablets/wk or none), aHEI (excluding fruits and vegetables)

**eFigure 2. Predicted plasma carotenoid scores and pooled RRs of advanced AMD according to A) age and B) smoking status**

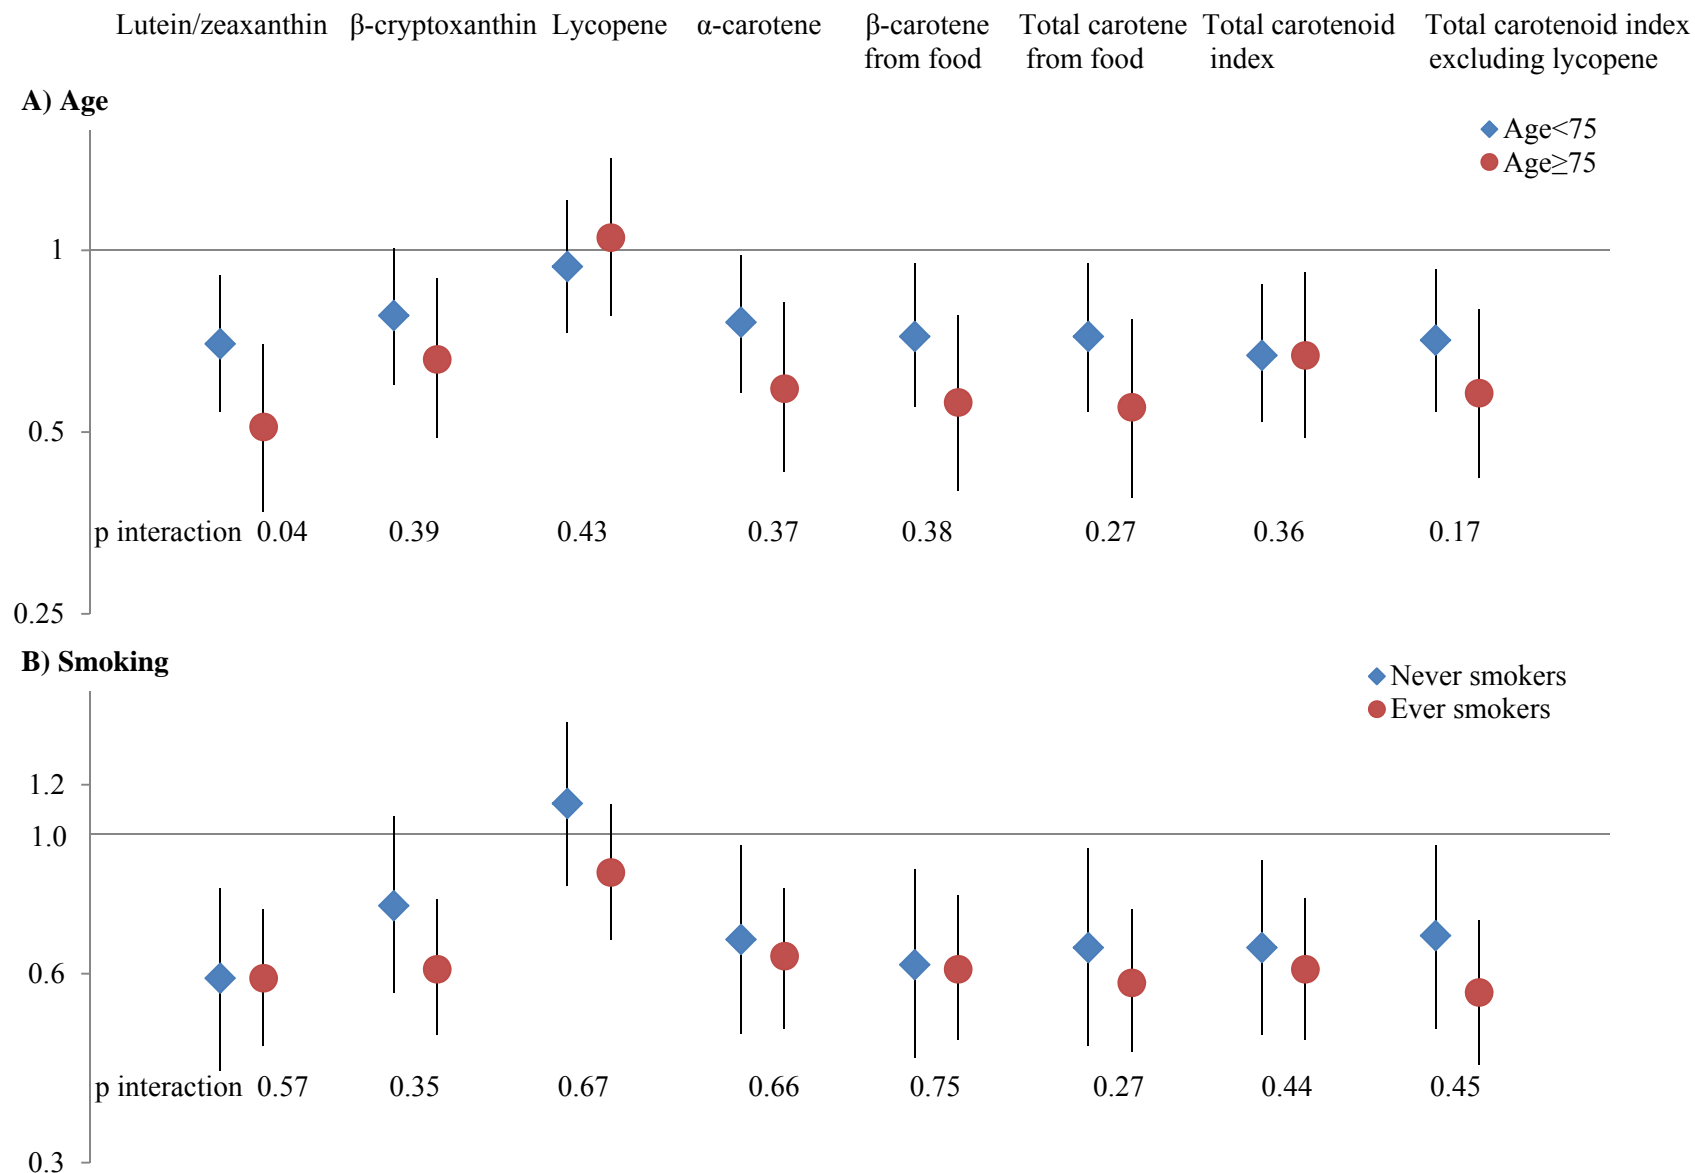

**A)** Multivariate models were adjusted for the same variables as in supplement Figure 1 and additionally adjusted for race in HPFS; 651 cases in age < 75 group (477 from NHS and 174 cases from HPFS); 467 cases in age ≥ 75 group (296 from NHS and 171 cases from HPFS).

**B)** Multivariate models were adjusted for the same variables as in A) except pack-year of smoking; 425 cases in never smokers group (289 from NHS and 136 cases from HPFS); 693 cases in ever smokers group (484 from NHS and 209 cases from HPFS)
